# Supplementary material
Source: publisher figshare collection journal article supplement (https://gsapubs.figshare.com/ndownloader/files/23300771)
Supplement: Supplementary file 1 [file 23300771]

## Sheet: Sheet1
Analytical spot	U (ppm)	Th (ppm)	U/Th	207Pb/206Pb	2SE	206Pb/238U	2SE	207Pb/235U	2SE	206Pb-238U age (Ma)	±	207Pb-235U age (Ma)	±
11AM08F-1	81	73	1.10959	0.0532	0.0026	0.02235	0.00044	0.1566	0.0076	142.5	2.8	147.8	6.8
11AM08F-2	1075	1020	1.05392	0.0499	0.0014	0.0159	0.00033	0.1045	0.0035	101.7	2.1	100.9	3.2
11AM08F-3	306	926	0.330454	0.0536	0.0031	0.0078	0.00016	0.0544	0.0033	50.1	1	53.7	3.2
11AM08F-4	409	255	1.60392	0.0513	0.0014	0.02921	0.00059	0.187	0.0061	185.6	3.7	173.9	5.2
11AM08F-5	754	280	2.69286	0.1415	0.0019	0.4718	0.0092	8.25	0.18	2491	40	2257	20
11AM08F-6	295	362	0.814917	0.0777	0.0012	0.1788	0.0037	1.701	0.039	1060	20	1008	15
11AM08F-7	226	167	1.35329	0.0524	0.002	0.01671	0.00036	0.1066	0.0044	106.8	2.3	102.7	4
11AM08F-8	713	1392	0.512213	0.0521	0.0017	0.00905	0.00019	0.0573	0.0023	58	1.2	56.6	2.2
11AM08F-9	179	140	1.27857	0.064	0.002	0.0894	0.0033	0.694	0.04	551	20	531	23
11AM08F-10	97	170	0.570588	0.0714	0.0059	0.007	0.0002	0.0603	0.0052	45	1.3	59.2	5
11AM08F-11	283	450	0.628889	0.0495	0.0016	0.01833	0.00037	0.1092	0.0038	117.1	2.3	105.1	3.5
11AM08F-12	107	276	0.387681	0.0701	0.0054	0.00752	0.0002	0.0629	0.0047	48.3	1.3	61.7	4.5
11AM08F-13	296	841	0.351962	0.0783	0.0041	0.00855	0.00017	0.081	0.0046	54.9	1.1	78.8	4.3
11AM08F-14	141	353	0.399433	0.0654	0.004	0.00731	0.00018	0.0575	0.0034	47	1.2	56.6	3.3
11AM08F-15	1197	359	3.33426	0.0711	0.0023	0.00991	0.0002	0.0862	0.0033	63.6	1.3	83.9	3.1
11AM08F-16	159	112	1.41964	0.0496	0.0024	0.01848	0.00041	0.1113	0.0056	118	2.6	107	5.1
11AM08F-17	1715	1550	1.10645	0.0559	0.001	0.03276	0.00062	0.2237	0.0051	207.8	3.9	204.9	4.2
11AM08F-18	85	152	0.559211	0.0555	0.0038	0.00893	0.00021	0.0614	0.0041	57.3	1.3	60.3	3.9
11AM08F-19	33	35	0.942857	0.0716	0.006	0.01581	0.00047	0.137	0.01	101.1	3	130	9.3
11AM08F-20	114	127	0.897638	0.0791	0.0097	0.00796	0.00018	0.0758	0.0088	51.1	1.2	74.7	8.5
11AM08F-21	80	171	0.467836	0.0491	0.0024	0.02562	0.00056	0.157	0.0077	163	3.5	147.6	6.8
11AM08F-22	55	119	0.462185	0.119	0.011	0.00862	0.00025	0.129	0.012	55.3	1.6	122	10
11AM08F-23	287	614	0.467427	0.0585	0.0023	0.01197	0.00024	0.0888	0.0037	76.7	1.5	86.2	3.4
11AM08F-24	207	81	2.55556	0.0818	0.0016	0.127	0.0026	1.328	0.035	771	15	857	15
11AM08F-25	44	105	0.419048	0.0744	0.0052	0.01473	0.0004	0.1396	0.0092	94.2	2.6	132	8.2
11AM08F-26	80	163	0.490798	0.1355	0.0071	0.00775	0.00018	0.1344	0.0071	49.8	1.1	127.5	6.3
11AM08F-27	229	570	0.401754	0.0568	0.0025	0.00742	0.00015	0.0553	0.0025	47.68	0.98	54.5	2.4
11AM08F-28	86	106	0.811321	0.0523	0.0038	0.00845	0.00021	0.0583	0.0043	54.2	1.3	57.3	4.1
11AM08F-29	313	374	0.836898	0.05669	0.00089	0.0658	0.0012	0.496	0.011	410.7	7.5	408.2	7.6
11AM08F-30	86	133	0.646617	0.0591	0.0048	0.00715	0.00018	0.0563	0.0045	45.9	1.2	55.4	4.3
11AM08F-31	264	282	0.93617	0.0756	0.003	0.00909	0.00019	0.0934	0.0042	58.3	1.2	90.5	3.9
11AM08F-32	323	455	0.70989	0.0481	0.0021	0.00725	0.00014	0.0488	0.0022	46.57	0.92	48.3	2.1
11AM08F-33	130	67	1.9403	0.0549	0.002	0.02407	0.00048	0.186	0.0074	153.3	3	172.8	6.3
11AM08F-34	245	302	0.811258	0.0627	0.0012	0.0817	0.0016	0.719	0.017	506.4	9.3	551	11
11AM08F-35	199	226	0.880531	0.0559	0.0021	0.01689	0.00036	0.1334	0.0053	108	2.3	127	4.8
11AM08F-36	54	94	0.574468	0.088	0.0062	0.00881	0.00022	0.1078	0.0074	56.5	1.4	104.1	7
11AM08F-37	280	338	0.828402	0.0584	0.0023	0.00875	0.00018	0.0729	0.0032	56.2	1.1	71.3	3
11AM08F-38	485	426	1.1385	0.0543	0.0017	0.00585	0.00013	0.045	0.0016	37.59	0.81	44.7	1.6
11AM08F-39	264	491	0.537678	0.0495	0.0022	0.0166	0.00035	0.1161	0.005	106.1	2.2	111.4	4.5
11AM08F-40	305	180	1.69444	0.0581	0.0017	0.03137	0.00062	0.2584	0.0083	199.1	3.9	233	6.7
11AM08F-41	385	822	0.46837	0.0517	0.0019	0.01219	0.00024	0.0892	0.0034	78.1	1.5	86.7	3.2
11AM08F-42	360	402	0.895522	0.0503	0.0018	0.01576	0.00031	0.1121	0.0043	100.8	2	107.8	3.9
11AM08F-44	84	129	0.651163	0.0581	0.0014	0.062	0.0012	0.498	0.013	388	7.1	410.5	9.2
11AM08F-45	217	218	0.995413	0.0806	0.0047	0.01678	0.00032	0.188	0.012	107.3	2	174	10
11AM08F-46	136	171	0.795322	0.0575	0.0031	0.03106	0.00077	0.247	0.013	197.2	4.8	223	10
11AM08F-47	118	159	0.742138	0.0601	0.004	0.01289	0.0003	0.1035	0.0056	82.5	1.9	99.7	5.2
11AM08F-48	34	67	0.507463	0.0683	0.0032	0.0431	0.0013	0.41	0.022	271.7	7.8	345	16
11AM08F-49	259	132	1.96212	0.0611	0.0011	0.0895	0.0018	0.758	0.018	552	10	572	11
11AM08F-50	221	281	0.786477	0.0811	0.0045	0.00752	0.00017	0.0838	0.0048	48.3	1.1	82.2	4.6
11AM08F-51	96	132	0.727273	0.087	0.0035	0.0698	0.0016	0.853	0.041	435.1	9.6	624	22
11AM08F-52	319	469	0.680171	0.0523	0.0017	0.00968	0.0002	0.0705	0.0025	62.1	1.3	69.1	2.4
11AM08F-53	219	153	1.43137	0.0882	0.0031	0.0787	0.002	0.966	0.042	488	12	684	22
11AM08F-54	215	372	0.577957	0.0626	0.0037	0.00698	0.00016	0.0616	0.0038	44.8	1	60.5	3.7
11AM08F-55	484	77	6.28571	0.0513	0.0011	0.01869	0.00035	0.1329	0.0033	119.4	2.2	126.6	3
11AM08F-56	355	525	0.67619	0.0522	0.0012	0.03155	0.0006	0.2281	0.0059	200.2	3.8	208.5	4.9
11AM08F-57	84	118	0.711864	0.0547	0.0053	0.00902	0.00024	0.0685	0.0067	57.9	1.6	66.9	6.4
11AM08F-58	410	81	5.06173	0.0861	0.0014	0.0666	0.0016	0.795	0.021	415.6	9.8	593	12
11AM08F-59	37	72	0.513889	0.0897	0.0095	0.00717	0.0003	0.0865	0.0086	46	1.9	83.6	8.1
11AM08F-60	409	559	0.731664	0.049	0.002	0.01369	0.00029	0.092	0.0039	87.6	1.9	89.3	3.6
11AM08F-61	77	133	0.578947	0.1077	0.0016	0.3162	0.0057	4.701	0.095	1771	28	1766	17
11AM08F-62	1315	852	1.54343	0.0494	0.0014	0.00816	0.00019	0.0556	0.0021	52.4	1.2	55	2.1
11AM08F-63	120	150	0.8	0.0799	0.0015	0.1962	0.0037	2.157	0.051	1155	20	1166	16
11AM08F-64	340	604	0.562914	0.0522	0.0013	0.03735	0.0007	0.2681	0.0073	236.4	4.4	240.9	5.8
11AM08F-65	68	62	1.09677	0.0794	0.0028	0.1076	0.0023	1.174	0.046	659	14	785	21
11AM08F-66	319	476	0.670168	0.0596	0.0028	0.00549	0.00013	0.0447	0.0022	35.29	0.84	44.4	2.1
11AM08F-67	197	365	0.539726	0.05	0.0026	0.00794	0.00017	0.0542	0.0029	51	1.1	53.4	2.8
11AM08F-68	306	194	1.57732	0.0495	0.0016	0.01673	0.00033	0.1138	0.0042	106.9	2.1	109.2	3.8
11AM08F-69	411	251	1.63745	0.1053	0.0056	0.00874	0.0002	0.1255	0.007	56.1	1.3	119.7	6.3
11AM08F-70	113	128	0.882812	0.0574	0.0015	0.0684	0.0013	0.531	0.015	426.3	7.8	433	11
11AM08F-71	191	375	0.509333	0.0565	0.0019	0.02485	0.00048	0.191	0.0067	158.2	3	177	5.7
11AM08F-72	483	104	4.64423	0.06	0.001	0.0821	0.0016	0.668	0.015	508.7	9.5	519.1	8.9
11AM08F-73	144	106	1.35849	0.0595	0.0031	0.01516	0.00033	0.1223	0.0067	97	2.1	116.7	6
11AM08F-74	136	196	0.693878	0.0612	0.0042	0.00782	0.00018	0.0644	0.0046	50.2	1.1	63.1	4.4
11AM08F-75	68	69	0.985507	0.0549	0.0046	0.01682	0.00042	0.1238	0.0095	107.5	2.7	117.6	8.5
11AM08F-76	51	92	0.554348	0.0755	0.0088	0.0106	0.00037	0.106	0.012	68	2.3	101	11
11AM08F-77	124	147	0.843537	0.0756	0.0015	0.1137	0.0022	1.155	0.029	694	13	779	14
11AM08F-78	81	127	0.637795	0.139	0.01	0.00833	0.00021	0.154	0.011	53.5	1.3	144.1	9.6
11AM08F-79	855	130	6.57692	0.0827	0.0018	0.1313	0.0039	1.455	0.046	795	22	911	19
11AM08F-80	140	160	0.875	0.0576	0.0035	0.01039	0.00024	0.0793	0.0047	66.6	1.5	77.2	4.5
11AM08F-81	17	47	0.361702	0.094	0.011	0.0167	0.00075	0.207	0.023	106.7	4.7	186	19
11AM08F-82	221	271	0.815498	0.0725	0.0039	0.01501	0.00037	0.1455	0.0087	96	2.3	137.6	7.7
11AM08F-83	204	272	0.75	0.0572	0.0033	0.03692	0.0008	0.283	0.018	233.7	5	251	14
11AM08F-84	128	333	0.384384	0.0637	0.0044	0.01031	0.00025	0.0873	0.0062	66.1	1.6	84.7	5.8
11AM08F-85	524	552	0.949275	0.086	0.019	0.00709	0.00019	0.081	0.02	45.6	1.2	77	18
11AM08F-86	146	61	2.39344	0.053	0.0013	0.04302	0.00079	0.3041	0.0086	271.5	4.9	269.1	6.7
11AM08F-87	247	267	0.925094	0.0569	0.0015	0.03497	0.00076	0.2637	0.0079	221.6	4.7	238.4	6.6
11AM08F-88	256	136	1.88235	0.054	0.0017	0.02647	0.00053	0.1906	0.0065	168.4	3.3	176.8	5.5
11AM08F-89	113	140	0.807143	0.0545	0.0031	0.01184	0.00026	0.085	0.0047	75.9	1.7	82.5	4.4
11AM08F-90	376	719	0.522949	0.0681	0.0036	0.00529	0.00011	0.0479	0.0026	34.02	0.68	47.4	2.5
11AM08F-91	454	1083	0.419206	0.0515	0.0025	0.01154	0.00028	0.0804	0.0042	73.9	1.8	78.5	3.9
11AM08F-92	130	172	0.755814	0.0511	0.0021	0.0162	0.00035	0.1108	0.0047	103.6	2.2	106.4	4.3
11AM08F-93	163	166	0.981928	0.0561	0.004	0.00591	0.00015	0.0458	0.0034	37.99	0.94	45.4	3.3
11AM08F-94	210	82	2.56098	0.1006	0.0017	0.2356	0.0049	3.286	0.071	1364	25	1477	17
11AM08F-95	161	194	0.829897	0.0551	0.0016	0.03803	0.00076	0.291	0.0092	240.6	4.7	259	7.2
11AM08F-96	241	465	0.51828	0.055	0.0028	0.00989	0.00022	0.0755	0.004	63.4	1.4	73.8	3.7
11AM08F-97	75	129	0.581395	0.0699	0.0051	0.0155	0.00042	0.15	0.011	99.1	2.7	141	9.4
11AM08F-98	217	237	0.915612	0.0808	0.0026	0.0984	0.0022	1.111	0.043	605	13	756	20
11AM08F-99	351	538	0.652416	0.048	0.0024	0.00754	0.00016	0.0501	0.0025	48.4	1	49.6	2.4
11AM08F-100	454	1003	0.452642	0.0546	0.0024	0.00869	0.00018	0.0651	0.0029	55.8	1.2	64	2.8
11AM08F-101	1058	1261	0.839017	0.0492	0.0014	0.0157	0.00033	0.1074	0.0038	100.4	2.1	103.5	3.5
11AM08F-102	199	399	0.498747	0.058	0.0025	0.0357	0.0008	0.286	0.014	226.1	5	254	11
11AM08F-103	370	477	0.775681	0.0487	0.0018	0.01453	0.00031	0.0971	0.0036	93	2	94	3.3
11AM08F-104	144	383	0.375979	0.0801	0.0055	0.00934	0.00022	0.103	0.0075	59.9	1.4	99	6.8
11AM08F-105	592	776	0.762887	0.0485	0.0018	0.00728	0.00018	0.048	0.002	46.8	1.1	47.6	1.9
11AM08F-106	298	345	0.863768	0.0502	0.002	0.0166	0.00033	0.1129	0.0047	106.1	2.1	108.5	4.3
11AM08F-107	829	2230	0.371749	0.0552	0.0025	0.0073	0.00015	0.0542	0.0024	46.89	0.94	53.5	2.3
11AM08F-108	103	78	1.32051	0.0583	0.0017	0.0901	0.0021	0.706	0.024	556	12	541	14
11AM08F-109	71	99	0.717172	0.0455	0.0042	0.02008	0.00051	0.123	0.012	128.1	3.2	117	10
11AM08F-110	74	113	0.654867	0.0517	0.004	0.00833	0.00021	0.0563	0.0042	53.5	1.4	55.3	4
11AM08F-111	148	515	0.287379	0.0528	0.0046	0.00691	0.00021	0.0487	0.0045	44.4	1.3	48.2	4.4
11AM08F-112	138	273	0.505495	0.0778	0.0058	0.00741	0.0002	0.0765	0.0059	47.6	1.3	74.5	5.5
11AM08F-113	84	170	0.494118	0.0683	0.0058	0.01414	0.00041	0.127	0.011	90.5	2.6	121.1	9.6
11AM08F-114	76	129	0.589147	0.0673	0.0059	0.01474	0.0004	0.129	0.01	94.3	2.6	122.5	9.4
11AM08F-115	479	1204	0.397841	0.0506	0.0014	0.01335	0.00025	0.0892	0.0027	85.5	1.6	86.7	2.5
11AM08F-116	36	90	0.4	0.087	0.011	0.01014	0.00043	0.116	0.015	65.1	2.7	110	13
11AM08F-117	146	292	0.5	0.0563	0.0034	0.0136	0.0003	0.1015	0.0057	87.1	1.9	97.8	5.2
11AM08F-118	77	166	0.463855	0.0576	0.0046	0.01567	0.00038	0.1184	0.0092	100.2	2.4	113.1	8.4
11AM08F-119	428	47	9.10638	0.056	0.0013	0.063	0.0014	0.466	0.013	394	8.6	388	9.3
11AM08F-120	73	165	0.442424	0.0822	0.006	0.01176	0.0003	0.1286	0.0094	75.3	1.9	121.8	8.4
11AM08F-121	1293	2984	0.433311	0.0695	0.0018	0.02219	0.00049	0.2047	0.0058	141.4	3.1	189	4.9
11AM08F-122	47	97	0.484536	0.123	0.012	0.01012	0.00039	0.169	0.017	64.9	2.5	156	15
11AM08F-123	357	452	0.789823	0.0955	0.0045	0.00991	0.00022	0.1327	0.0062	63.6	1.4	126.3	5.6
11AM08F-124	450	306	1.47059	0.0546	0.0017	0.03585	0.0007	0.28	0.011	227.1	4.4	249.9	8.3
11AM08F-125	291	305	0.954098	0.0583	0.003	0.00691	0.00015	0.0575	0.003	44.42	0.93	56.7	2.8
11AM08F-126	100	148	0.675676	0.0913	0.0071	0.00922	0.00025	0.1205	0.0096	59.1	1.6	114.9	8.6
11AM08F-127	515	972	0.529835	0.0512	0.0022	0.00858	0.0002	0.0633	0.0029	55.1	1.3	62.3	2.8
11AM08F-128	417	314	1.32803	0.0676	0.0012	0.0908	0.0017	0.891	0.02	560	10	646	11
11AM08F-129	1047	1016	1.03051	0.0516	0.0022	0.01072	0.00023	0.0806	0.0035	68.7	1.5	78.7	3.3
11AM08F-130	76	157	0.484076	0.257	0.019	0.00568	0.00024	0.213	0.017	36.5	1.5	195	14
11AM08F-131	504	832	0.605769	0.0627	0.0026	0.01473	0.00036	0.135	0.0058	94.2	2.3	128.4	5.2
11AM08F-132	101	110	0.918182	0.0689	0.002	0.1149	0.0024	1.162	0.038	701	14	781	18
11AM08F-133	80	210	0.380952	0.0622	0.0034	0.01997	0.00046	0.182	0.01	127.4	2.9	168.8	8.8
11AM08F-134	167	262	0.637405	0.0472	0.0044	0.00469	0.00014	0.0325	0.003	30.13	0.89	32.3	3
11AM08F-135	32	42	0.761905	0.081	0.0085	0.01638	0.00054	0.19	0.018	104.7	3.4	176	16
11AM08F-136	67	198	0.338384	0.0647	0.0025	0.0573	0.0012	0.542	0.022	359	7.6	438	14
11AM08F-137	26	24	1.08333	0.2189	0.0062	0.455	0.012	14.39	0.62	2418	55	2783	32
11AM08F-138	35	58	0.603448	0.083	0.01	0.00778	0.00027	0.093	0.011	50	1.7	89	10
11AM08F-139	242	435	0.556322	0.0682	0.0063	0.00468	0.00014	0.047	0.0042	30.11	0.89	46.6	4.1
11AM08F-140	218	505	0.431683	0.0552	0.002	0.0161	0.00033	0.1294	0.0049	103	2.1	123.3	4.4
11AM08F-141	654	1038	0.630058	0.0556	0.002	0.01075	0.00021	0.0869	0.0034	68.9	1.3	84.5	3.2
11AM08F-142	317	393	0.806616	0.0517	0.0029	0.00645	0.00015	0.0481	0.0028	41.42	0.96	47.7	2.7
11AM08F-143	158	270	0.585185	0.0567	0.0042	0.00777	0.00019	0.0641	0.0051	49.9	1.2	62.8	4.9
11AM08F-144	55	74	0.743243	0.0617	0.007	0.01274	0.00042	0.112	0.012	81.6	2.7	109	12
11AM08F-145	4	12	0.333333	0.415	0.07	0.015	0.0014	0.79	0.12	95.8	8.8	548	67
11AM08F-146	190	133	1.42857	0.0593	0.0018	0.04053	0.00092	0.346	0.013	256.1	5.7	300.7	9.7
11AM08F-147	226	1034	0.218569	0.0654	0.0052	0.00765	0.00016	0.0711	0.0056	49.1	1	69.5	5.3
11AM08F-148	75	197	0.380711	0.161	0.012	0.00984	0.00031	0.227	0.017	63.1	2	206	14
11AM08F-149	9	22	0.409091	0.142	0.034	0.0119	0.0013	0.228	0.062	76.3	8.6	206	53
11AM08F-150	808	485	1.66598	0.056	0.0013	0.03336	0.00067	0.2636	0.0068	211.5	4.2	237.3	5.5
11AM08F-151	791	615	1.28618	0.0521	0.0025	0.01368	0.0004	0.0985	0.0043	87.6	2.5	95.2	4
11AM08F-152	274	311	0.881029	0.0487	0.0025	0.00679	0.00014	0.0457	0.0023	43.65	0.89	45.3	2.2
11AM08F-153	80	148	0.540541	0.059	0.0018	0.089	0.0018	0.731	0.025	550	11	556	14
11AM08F-154	41	52	0.788462	0.0476	0.0042	0.01437	0.00035	0.0928	0.008	92	2.2	89.1	7.4
11AM08F-155	173	216	0.800926	0.0586	0.0028	0.01774	0.00037	0.1428	0.0069	113.3	2.3	135.2	6.1
11AM08F-156	47	69	0.681159	0.0526	0.0064	0.01133	0.0003	0.0806	0.0096	72.6	1.9	77.8	8.9
11AM08F-157	619	1074	0.57635	0.0542	0.0025	0.00619	0.00014	0.0458	0.0022	39.77	0.9	45.5	2.2
11AM08F-158	430	1048	0.410305	0.0531	0.0032	0.00624	0.00014	0.0451	0.0026	40.13	0.88	44.7	2.5
11AM08F-159	121	43	2.81395	0.0629	0.0016	0.0895	0.0017	0.763	0.023	553	10	579	14
11AM08F-160	198	164	1.20732	0.0582	0.0045	0.00591	0.00016	0.0465	0.0035	38	1	46.1	3.4
11AM08F-161	34	36	0.944444	0.0902	0.0078	0.02608	0.00083	0.318	0.027	165.9	5.2	277	20
11AM08F-162	37	60	0.616667	0.131	0.019	0.02432	0.00091	0.437	0.063	154.9	5.7	360	44
11AM08F-163	354	21	16.8571	0.05587	0.00093	0.0666	0.0013	0.504	0.012	415.5	7.9	414.1	7.8
11AM08F-164	759	198	3.83333	0.0705	0.003	0.00452	0.00012	0.0431	0.0018	29.1	0.8	42.8	1.8
11AM08F-165	138	108	1.27778	0.0569	0.003	0.01315	0.00029	0.1015	0.0055	84.2	1.8	97.9	5.1
11AM08F-166	18	11	1.63636	0.095	0.019	0.01017	0.00058	0.118	0.021	65.2	3.7	115	20
